# Supplementary material for: Global oceanic diazotroph database version 2 and elevated estimate of global oceanic N 2 fixation
Source: Copernicus journal article supplement (doi:10.5194/essd-15-3673-2023), 2023-08-15
Supplement: Supplementary file 1 [file essd-15-3673-2023-supplement.pdf]

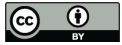

*Supplement of*

## **Global oceanic diazotroph database version 2 and elevated estimate of global oceanic N<sub>2</sub> fixation**

**Zhibo Shao et al.**

*Correspondence to:* Ya-Wei Luo ([ywluo@xmu.edu.cn](mailto:ywluo@xmu.edu.cn))

The copyright of individual parts of the supplement might differ from the article licence.

## Supporting information

### Includes:

Fig. S1- Fig. S7

Table S1 - Table S4

References

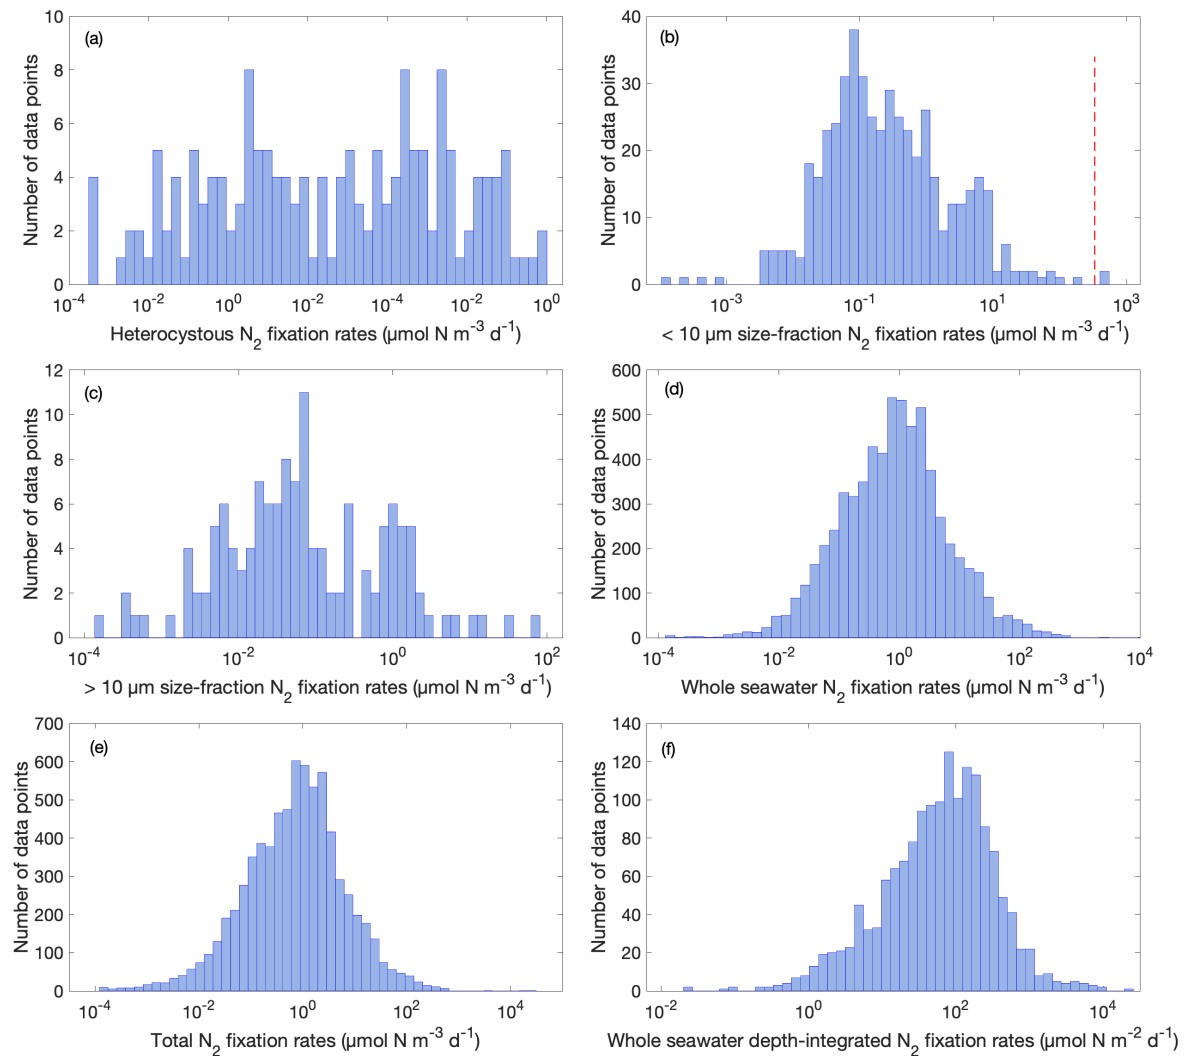

**Figure S1.** Histogram of volumetric  $N_2$  fixation rates measurements for (a) heterocystous  $N_2$  fixation, (b)  $<10 \mu\text{m}$  diazotrophic  $N_2$  fixation, (c)  $>10 \mu\text{m}$  diazotrophic  $N_2$  fixation, (d) whole seawater  $N_2$  fixation, (e) total  $N_2$  fixation and (f) depth-integrated  $N_2$  fixation (non-zero values). Data values are on logarithmic scale. Red line denotes the results of quality control, indicating the critical values above which data are likely outliers.

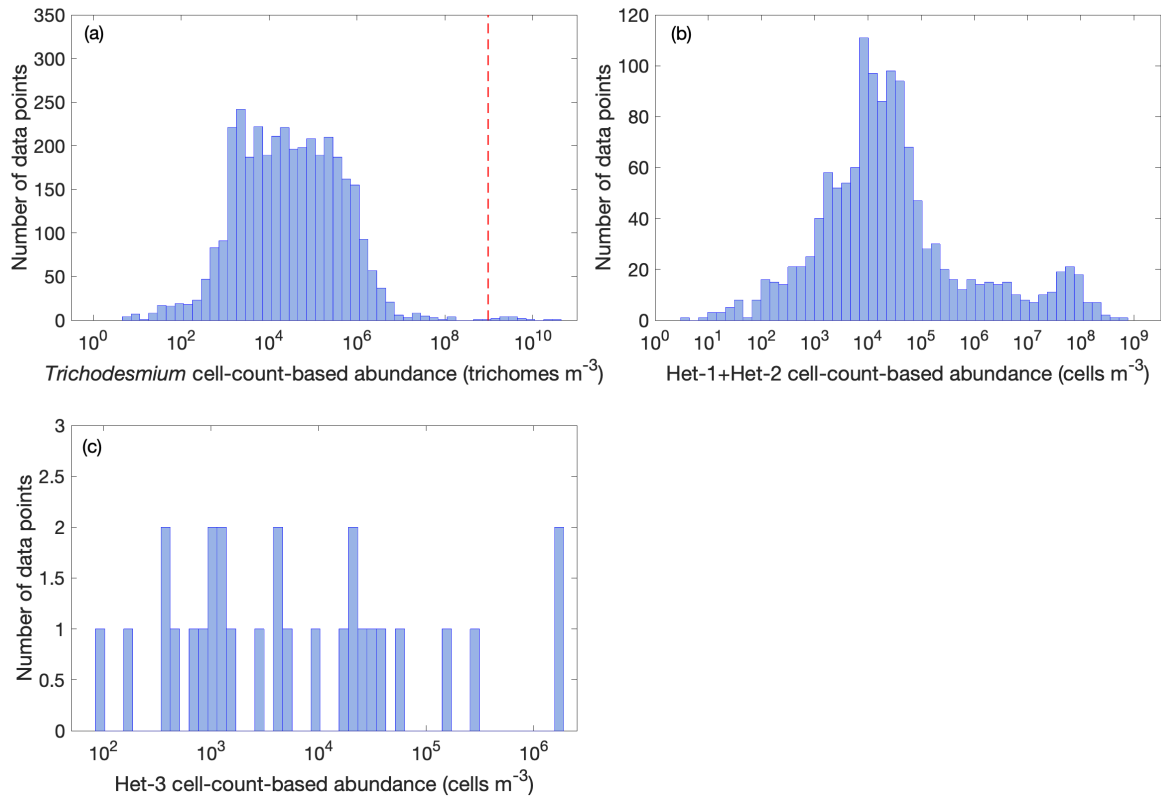

**Figure S2.** Histogram of volumetric cell counts measurements for (a) *Trichodesmium*, (b) Het-1+Het-2, and (c) Het-3 (non-zero values). Data values are on logarithmic scale. Red line denotes the results of quality control, indicating the critical values above which data are likely outliers.

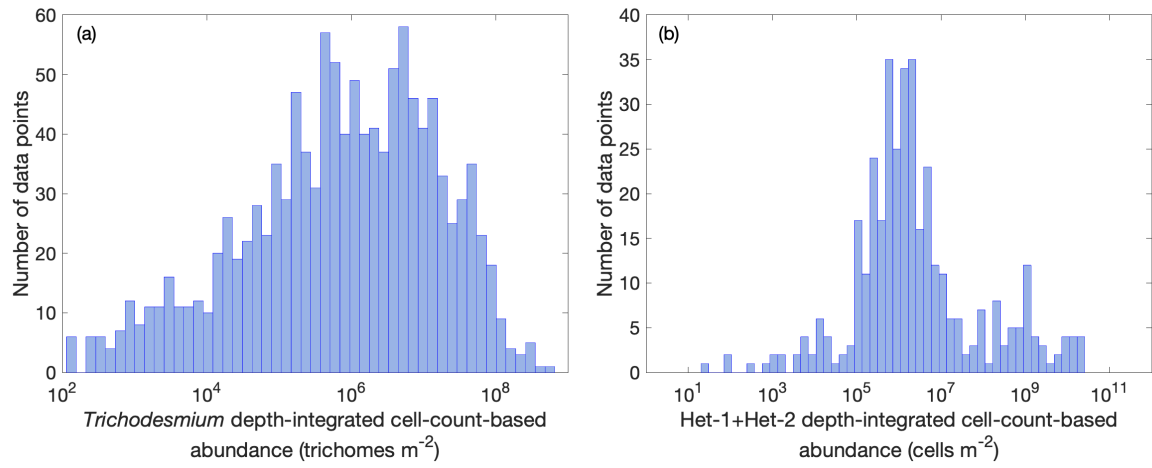

**Figure S3.** Histogram of depth-integrated cell counts measurements for (a) *Trichodesmium* and (b) Het-1 + Het-2 (non-zero values). Data values are on logarithmic scale.

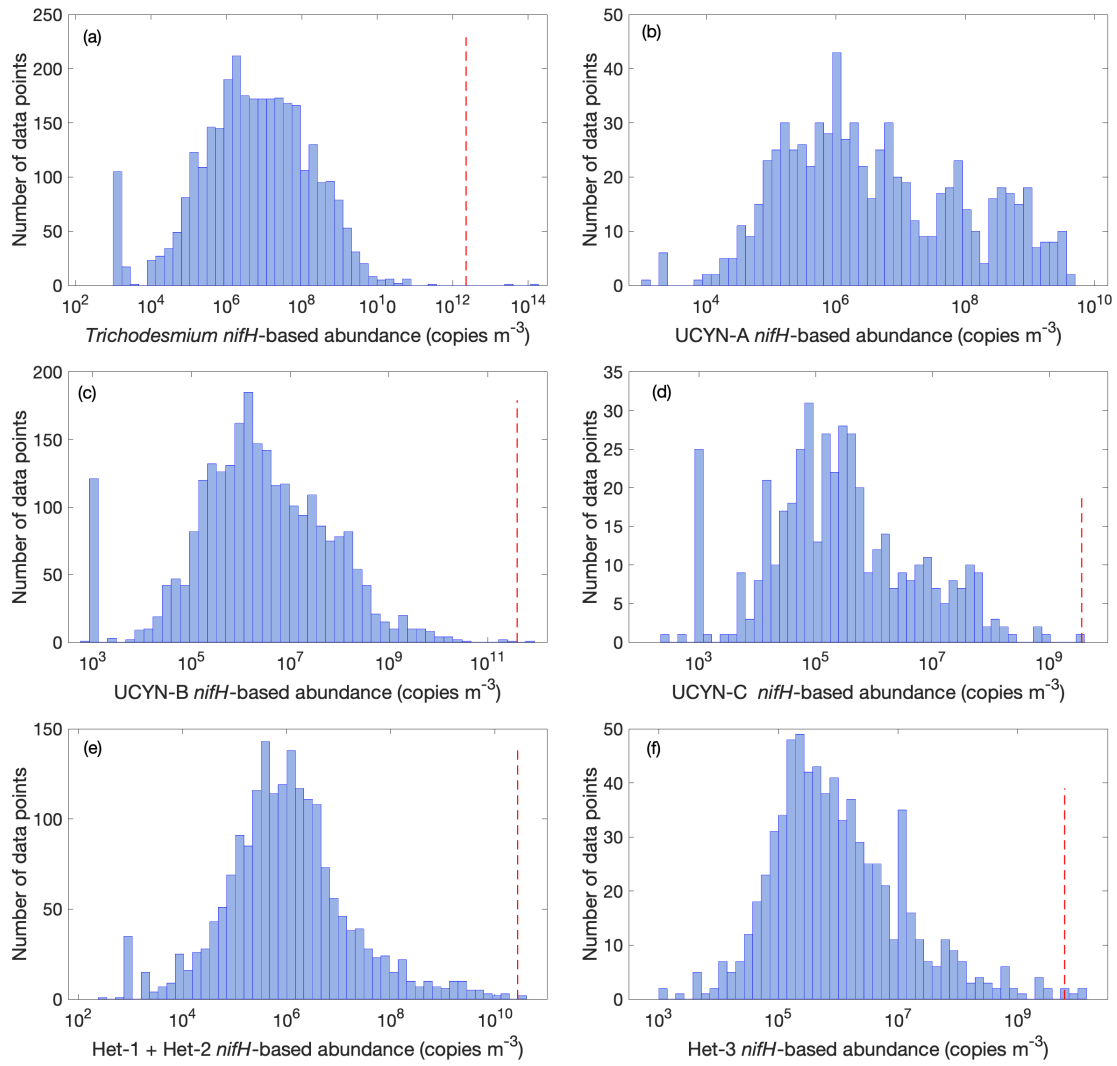

**Figure S4.** Histogram of volumetric *nifH* qPCR copies measurements for (a) *Trichodesmium*, (b) UCYN-A, (c) UCYN-B, (d) UCYN-C (e) Het-1 + Het-2, and (f) Het-3 (non-zero values). Data values are on logarithmic scale. Red line denotes the results of quality control, indicating the critical values above which data are likely outliers.

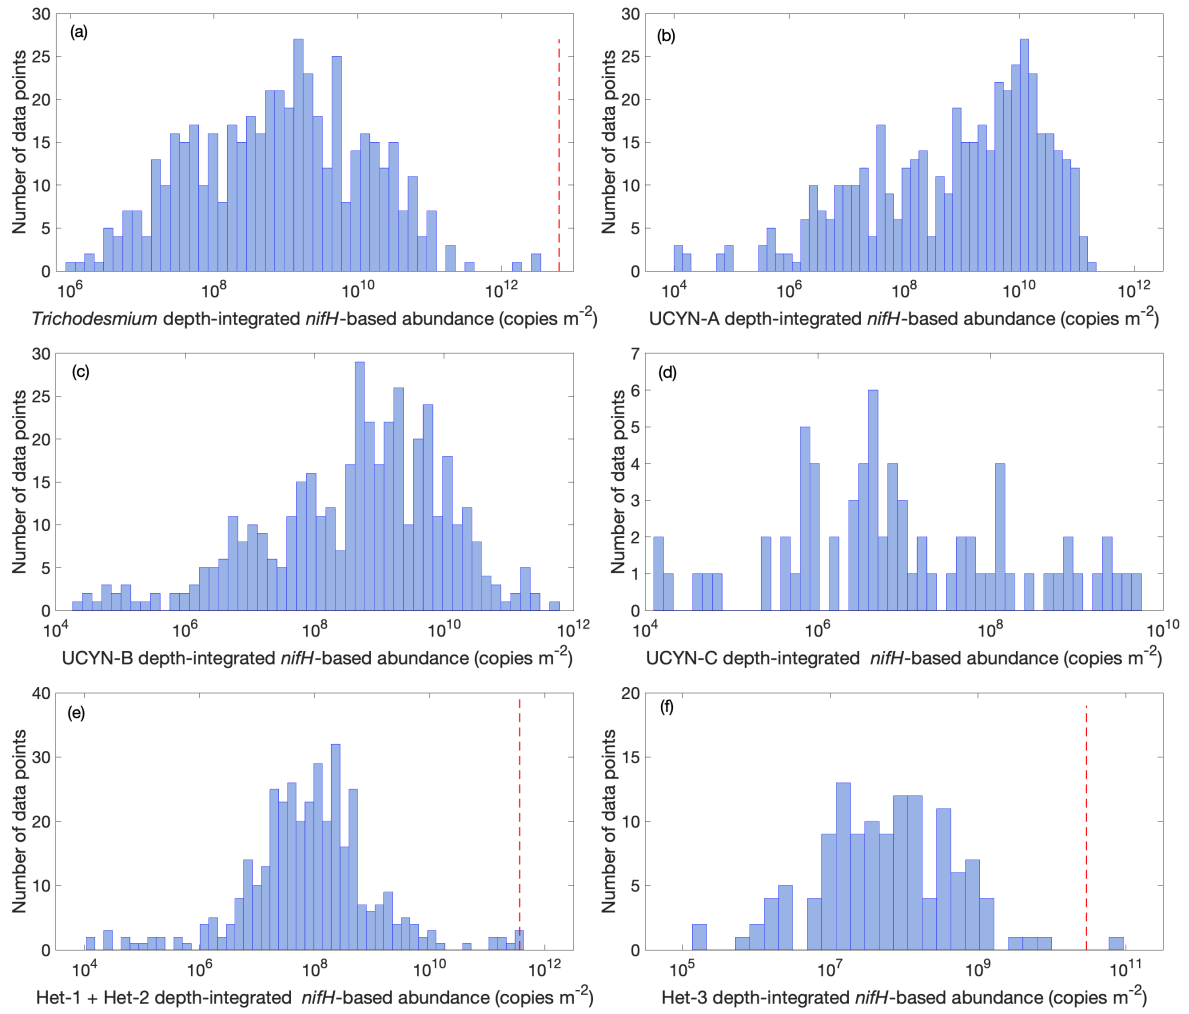

**Figure S5.** Histogram of depth-integrated *nifH* qPCR copies measurements for (a) *Trichodesmium*, (b) UCYN-A, (c) UCYN-B, (d) UCYN-C (e) Het-1 + Het-2, and (f) Het-3 (non-zero values). Data values are on logarithmic scale. Red lines denote the results of quality control, indicating the critical values above which data are likely outliers.

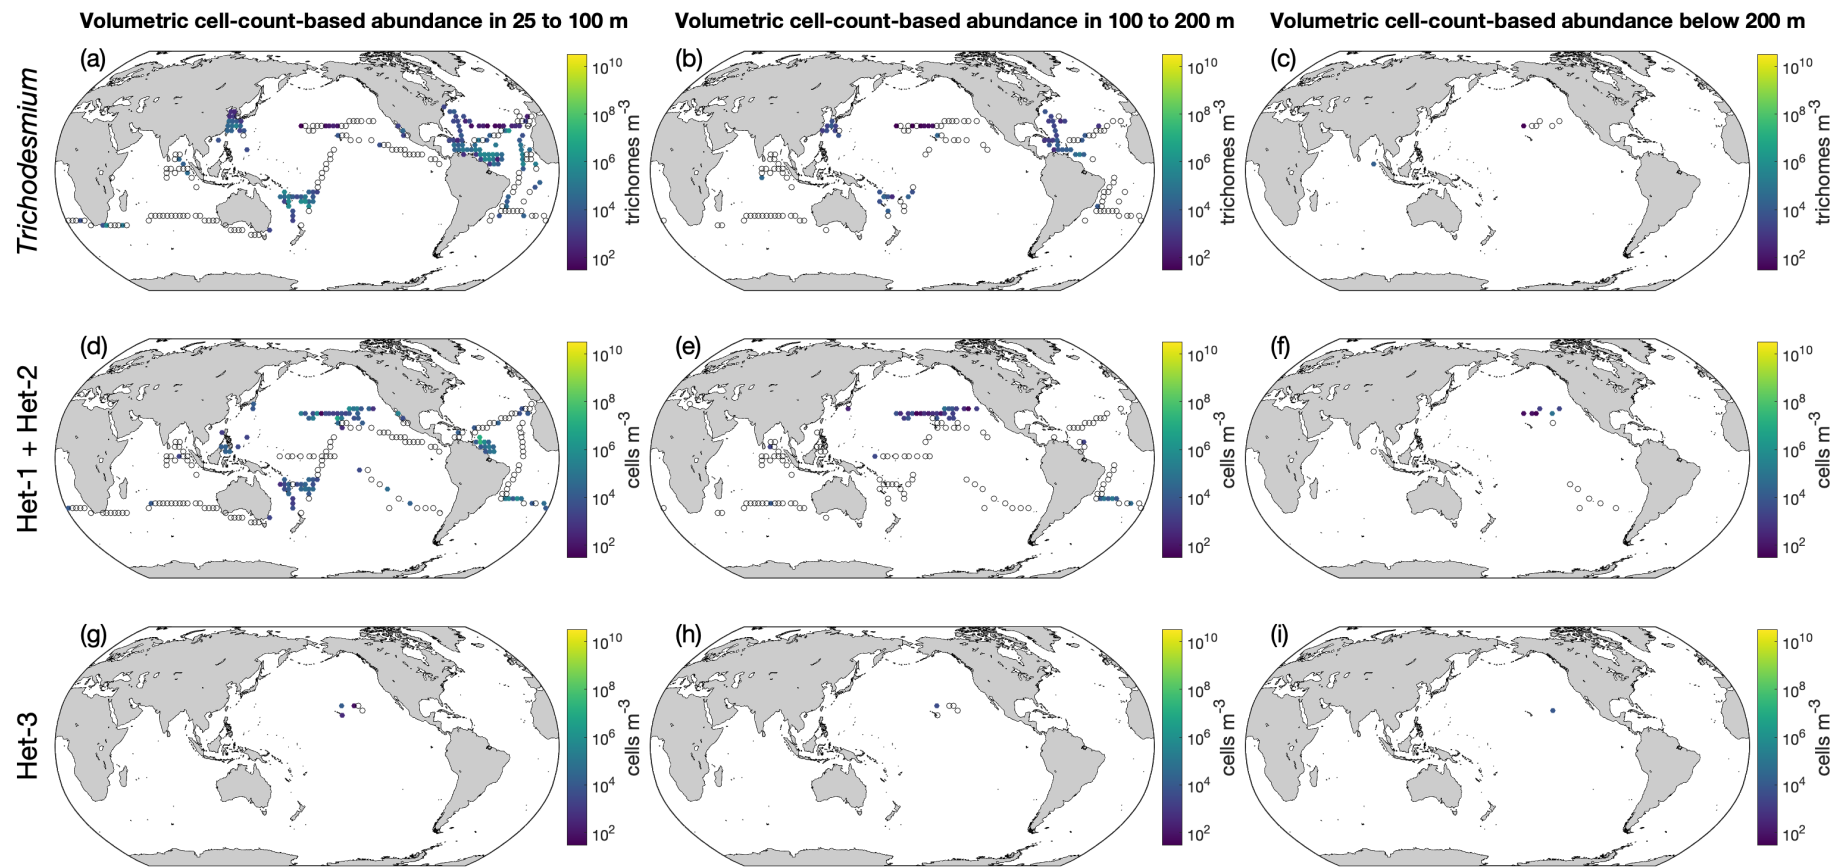

**Figure S6.** Volumetric cell abundance of diazotrophic groups. The panels show *Trichodesmium* (a–c), Het-1 + Het-2 (d–f) and Het-3(g–i) volumetric data in depth ranges of 25–100 m (a, d, g), 100–200 m (b, e, h) and below 200 m (c, f, i). For clear demonstration, data are binned to  $3^\circ \times 3^\circ$  and geometric means in each bin are shown. Zero-value data are denoted as open black circles.

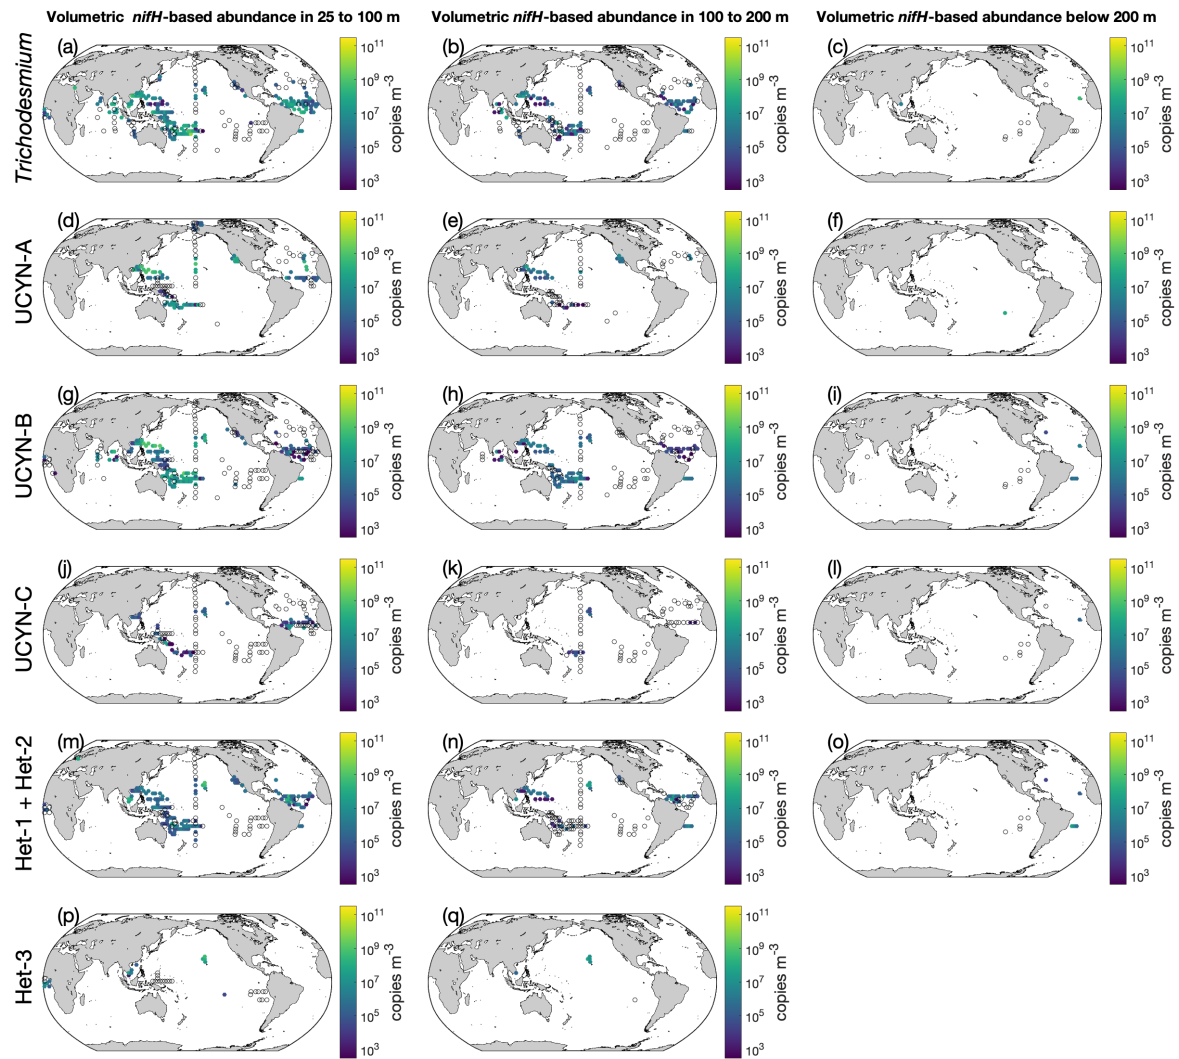

**Figure S7.** Volumetric *nifH* gene copy abundances of different diazotrophic groups. The panels show *Trichodesmium* (a–c), UCYN-A (d–f), UCYN-B (g–i), UCYN-C (j–l), Het-1 + Het-2 (m–o) and Het-3 (p, q) volumetric data in depth ranges of 25–100 m (a, d, g, j, m, p), 100–200 m (b, e, h, k, n, q) and below 200 m (c, f, i, l, o). For clear demonstration, data are binned to  $3^\circ \times 3^\circ$  and geometric means in each bin are shown. Zero-value data are denoted as open black circles. *Calothrix* volumetric abundance has no data below 200 m.



**Table S1.** Summary of data points of cell-specific N<sub>2</sub> fixation rates in the version 2 of the database, including measurements for *Trichodesmium*, UCYN-A, UCYN-A1, UCYN-A2, UCYN-B, *Richelia*, *Calothrix*, cyanobacteria, and non-cyanobacteria diazotrophs (NCDs).

| Reference                                                       | Region                 | <i>Trichodesmium</i>       | UCYN-A                 | UCYN-A1                | UCYN-A2                | UCYN-B                   | <i>Richelia</i>             | <i>Calothrix</i>           | Unclassified Cyanobacteria | NCDs                    |
|-----------------------------------------------------------------|------------------------|----------------------------|------------------------|------------------------|------------------------|--------------------------|-----------------------------|----------------------------|----------------------------|-------------------------|
| <i>Rates in unit of fmol N cell<sup>-1</sup> d<sup>-1</sup></i> |                        |                            |                        |                        |                        |                          |                             |                            |                            |                         |
| Benavides et al. (2022)                                         | Tropical SW Pacific    | 101.65 ± 25.87<br>(n = 6)  |                        |                        |                        |                          |                             |                            |                            |                         |
| Benavides et al. (2017)                                         | SW Pacific             | 277.32 ± 189.80<br>(n = 2) |                        |                        |                        |                          |                             |                            |                            |                         |
| Bonnet et al. (2018)                                            | Tropical SW Pacific    | 64.00 ± 30.03<br>(n = 3)   |                        |                        |                        | 18.05 ± 11.95<br>(n = 2) |                             |                            |                            |                         |
| Foster et al. (2011)                                            | N Pacific              |                            |                        |                        |                        | 91.80 ± 52.92<br>(n = 2) | 463.71 ± 105.08<br>(n = 18) | 860.04 ± 855.96<br>(n = 2) |                            |                         |
| Foster et al. (2013)                                            | N Pacific              |                            |                        |                        |                        | 11.64 ± 2.35<br>(n = 6)  |                             |                            |                            |                         |
| Foster et al. (2022)                                            | Tropical NW Atlantic   |                            |                        |                        |                        |                          | 101.35 ± 29.09<br>(n = 39)  |                            |                            |                         |
| Gradoville et al. (2020)                                        | N Pacific              |                            |                        | 8.07 ± 1.11<br>(n = 5) |                        |                          |                             |                            |                            |                         |
| Gradoville et al. (2021)                                        | N Pacific              |                            |                        | 3.34 ± 0.44<br>(n=17)  |                        |                          |                             |                            |                            |                         |
| Harding et al. (2018)                                           | Arctic Ocean           |                            |                        |                        | 7.10 ± 6.00<br>(n = 2) |                          |                             |                            |                            |                         |
| Harding et al. (2022)                                           | Subtropical N Pacific  |                            |                        |                        |                        |                          |                             |                            | 0.33 ± 0.05<br>(n= 40)     | 0.69 ± 0.27<br>(n = 34) |
| Krupke et al. (2013)                                            | Subtropical N Atlantic |                            | 0.04 ± 0.00<br>(n = 4) |                        |                        | 8.78 ± 4.63<br>(n = 2)   |                             |                            |                            |                         |

| Reference                                         | Region                             | <i>Trichodesmium</i>      | UCYN-A             | UCYN-A1                 | UCYN-A2                    | UCYN-B                  | <i>Richelia</i> | <i>Calothrix</i> | Unclassified Cyanobacteria | NCDs               |
|---------------------------------------------------|------------------------------------|---------------------------|--------------------|-------------------------|----------------------------|-------------------------|-----------------|------------------|----------------------------|--------------------|
| Krupke et al. (2015)                              | Subtropical NE Atlantic            |                           | 0.07<br>(n = 1)    |                         |                            |                         |                 |                  |                            |                    |
| Martínez-Pérez et al. (2016)                      | Tropical N Atlantic                | 51.03 ± 6.41<br>(n = 101) |                    | 3.39 ± 0.44<br>(n = 57) | 172.26 ± 12.88<br>(n = 10) |                         |                 |                  |                            |                    |
| McCarthy and Carpenter (1979)                     | N Atlantic                         | 31.72 ± 4.85<br>(n = 24)  |                    |                         |                            |                         |                 |                  |                            |                    |
| Mills et al. (2020)                               | California Current System          |                           |                    | 0.51 ± 0.07<br>(n = 15) | 5.96 ± 1.77<br>(n = 9)     |                         |                 |                  |                            |                    |
| Turk-Kubo et al. (2021)                           | Southern California Current System |                           |                    | 1.12 ± 0.41<br>(n = 26) | 17.45 ± 2.73<br>(n = 17)   |                         |                 |                  |                            |                    |
| <b>Mean</b>                                       |                                    | <b>53 ± 6</b>             | <b>0.05 ± 0.01</b> | <b>2.7 ± 0.3</b>        | <b>55 ± 12</b>             | <b>26 ± 11</b>          | <b>216 ± 44</b> | <b>860 ± 856</b> | <b>0.33 ± 0.05</b>         | <b>0.69 ± 0.27</b> |
| <i>Rates in a different unit (d<sup>-1</sup>)</i> |                                    |                           |                    |                         |                            |                         |                 |                  |                            |                    |
| Filella et al. (2022)                             | S Pacific Gyre                     | 0.02 ± 0.01<br>(n = 13)   |                    |                         |                            | 0.00 ± 0.00<br>(n = 12) |                 |                  |                            |                    |

**Table S2.** Summary of comparison measurements of abundance of cells and *nifH* gene copies, including reported mean abundance and ranges (numbers in parentheses). The ratios of *nifH* gene copies to cell abundance are shown as mean  $\pm$  s.d.

| Reference                | Groups               | Cell abundance<br>(cells L <sup>-1</sup> ) | <i>NifH</i> abundance<br>(gene copies L <sup>-1</sup> ) | <i>NifH</i> :cell |
|--------------------------|----------------------|--------------------------------------------|---------------------------------------------------------|-------------------|
| Gradoville et al. (2022) | <i>Crocospaera</i>   | 89,900 (220 – 240,000)                     | 165,000 (290 – 378,000)                                 | 1.8 <sup>a</sup>  |
| Gradoville et al. (2022) | <i>Trichodesmium</i> | 2,340 (235 – 5,900)                        | 15,300 (775– 145,000)                                   | 2.7 <sup>a</sup>  |
| Gradoville et al. (2022) | <i>Richelia</i>      | 950 (160 – 2,330)                          | 2,630 (260 – 5,230)                                     | 2.6 <sup>a</sup>  |
| Gradoville et al. (2022) | <i>Calothrix</i>     | 1,020 (156– 2,000)                         | 1,400 (136– 2,390)                                      | 1.5 <sup>a</sup>  |
| White et al. (2018)      | <i>Trichodesmium</i> | 1,130 (8 – 4,130)                          | 207,000 (593 – 1,460,000)                               | 148 $\pm$ 248     |
| White et al. (2018)      | Het 1-3              | 190 <sup>b</sup> (78 – 390)                | 21,200 (148 – 124,000)                                  | 76 $\pm$ 93       |
| Lu et al. (2018)         | <i>Trichodesmium</i> | 221,000 (19,000 – 423,000 <sup>c</sup> )   | 2,020,000 (42,300 – 40,400,000 <sup>c</sup> )           | 49 $\pm$ 66       |
| Wilson et al. (2017)     | <i>Crocospaera</i>   | 500                                        | 1800                                                    | 3.6               |
| Sargent et al. (2016)    | <i>Trichodesmium</i> | (56 – 18,000) <sup>d</sup>                 | (0 – 270,000) <sup>d</sup>                              | 12 $\pm$ 13       |
| Sargent et al. (2016)    | <i>Trichodesmium</i> | (0 – 19,000) <sup>d</sup>                  | (0 – 670,000) <sup>d</sup>                              | 31 $\pm$ 30       |
| Krupke et al. (2013)     | UCYN-A               | 134,000 (1,760 – 819,000)                  | 746,000 (37,200 – 3,690,000)                            | 14 $\pm$ 10       |

<sup>a</sup> Slope in the regression test.

<sup>b</sup> Reported heterocystous cell numbers are converted to total diazotrophic cells by assuming each heterocystous cell is associated with five vegetative cells.

<sup>c</sup> Data collected during *Trichodesmium* blooms.

<sup>d</sup> No average data reported.

**Table S3.** Summary of a few considerations for application and interpretation of qPCR and microscopy counting for enumeration and activity (RNA) of diazotrophs.

| Consideration                      | Comment                                                                                                                                                                                                                                                                                                                                                                                              |
|------------------------------------|------------------------------------------------------------------------------------------------------------------------------------------------------------------------------------------------------------------------------------------------------------------------------------------------------------------------------------------------------------------------------------------------------|
| Cell identity                      | <i>Microscopy:</i> Cross-comparison of cell counts can be difficult as training and experience varies.                                                                                                                                                                                                                                                                                               |
| Patchy distribution, low abundance | <i>Both methods:</i> collection of samples (volumes, depths) are dependent on logistics; collection strategies can vary: size fractionation, gravity filtration (microscopy), etc.<br><i>Microscopy:</i> potential to underestimate/overestimate if the minimum number of cells is not enumerated.<br><i>qPCR:</i> potential to underestimate if targets are below detection of assay (1-10 copies). |
| Dead or moribund cells             | <i>Both methods</i> do not distinguish vitality, thus potential to overestimate.                                                                                                                                                                                                                                                                                                                     |
| Primer design                      | <i>qPCR:</i> potential to overestimate if primers cross-react with non-targets; potential to underestimate if primers are too specific to a limited/unknown micro- diversity.                                                                                                                                                                                                                        |
| Polyploidy                         | Some bacteria, including data on <i>Trichodesmium</i> , <i>Richelia</i> , generate multiple genome copies during their life cycle (Sargent et al., 2016; White et al., 2018; Karlush et al., 2021).                                                                                                                                                                                                  |
| Gene copy number                   | Filamentous cyanobacteria (includes heterocystous cyanobacteria) possess a genome copy in each cell; it is not known for all diazotrophs the number of <i>nifH</i> copies/cell, often assumed to be one.                                                                                                                                                                                             |
| DNA/RNA Extraction efficiency      | Not all targets extract uniformly; RNA is prone to degrade                                                                                                                                                                                                                                                                                                                                           |

**Table S4.** Biomass conversion factors for heterocystous diazotroph-diatom associations. The numbers in parentheses are ranged used in the estimation.

| <i>Richelia</i> Groups |                                                              | <i>Richelia-Hemiaulus</i> |                  | <i>Richelia-Rhizosolenia</i> |                  | <i>Richelia-Chaetoceros</i> |                  |
|------------------------|--------------------------------------------------------------|---------------------------|------------------|------------------------------|------------------|-----------------------------|------------------|
| Number of observations |                                                              | 251                       |                  | 92                           |                  | 48                          |                  |
| Heterocyst cell        | Biovolume ( $\mu\text{m}^3$ )                                | 97<br>(34–678)            |                  | 248<br>(29–1124)             |                  | 62<br>(17–258)              |                  |
|                        | Biomass ( $\text{pg C cell}^{-1}$ )                          | 22<br>(9–120)             |                  | 51<br>(8–186)                |                  | 15<br>(5–52)                |                  |
| Vegetative cell        | Biovolume ( $\mu\text{m}^3$ )                                | 14<br>(2–87)              |                  | 31<br>(4–151)                |                  | 14<br>(6–31)                |                  |
|                        | Biomass ( $\text{pg C cell}^{-1}$ )                          | 4<br>(1–20)               |                  | 8<br>(2–33)                  |                  | 4<br>(2–8)                  |                  |
| Diazotrophic filaments | Heterocysts per DDA                                          | 1                         | 2                | 1                            | 5                | 3                           | 10               |
|                        | Vegetative cells per heterocyst                              | 3<br>(1–8)                |                  | 5<br>(3–10)                  |                  | 5<br>(1–19)                 |                  |
|                        | Number of vegetative cells per DDA                           | 3<br>(1–8)                | 6<br>(2–16)      | 5<br>(3–10)                  | 25<br>(15–50)    | 15<br>(3–57)                | 50<br>(10–190)   |
|                        | Diazotrophic biomass ( $\text{pg C DDA}^{-1}$ ) <sup>a</sup> | 34<br>(10–280)            | 68<br>(20–560)   | 91<br>(14–516)               | 455<br>(70–2580) | 105<br>(21–612)             | 350<br>(70–2040) |
| Diatom                 | Biovolume ( $\mu\text{m}^3$ )                                | 10800<br>(7050–20900)     |                  | 57100<br>(439–188000)        |                  | 1480<br>(300–4630)          |                  |
|                        | Biomass ( $\text{pg C cell}^{-1}$ ) <sup>b</sup>             | 418<br>(287–748)          |                  | 1814<br>(25–5184)            |                  | 73<br>(18–288)              |                  |
| DDA                    | Biomass ( $\text{pg C heterocyst}^{-1}$ ) <sup>c</sup>       | 452<br>(297–1028)         | 243<br>(154–654) | 1905<br>(39–5700)            | 454<br>(19–1553) | 59<br>(13–300)              | 42<br>(9–233)    |

<sup>a</sup> number of vegetative cells  $\times$  vegetative cell biomass + number of heterocyst  $\times$  heterocyst cell biomass.

<sup>b</sup> Based on an empirical relationship (Menden-Deuer and Lessard, 2000) : biomass =  $0.117 \times \text{biovolume}^{0.881}$ .  
Biovolume of diatom comes from a database (Harrison et al., 2015)

<sup>c</sup> (Diatom biomass + diazotrophic biomass)/number of heterocyst.

<sup>a</sup> number of vegetative cells  $\times$  vegetative cell biomass + number of heterocyst  $\times$  heterocyst cell biomass.

<sup>b</sup> Based on an empirical relationship (Menden-Deuer and Lessard, 2000) : biomass =  $0.117 \times \text{biovolume}^{0.881}$ .  
Biovolume of diatom comes from a database (Harrison et al., 2015)

<sup>c</sup> (Diatom biomass + diazotrophic biomass)/number of heterocyst.

## References

- Foster, R. A., Kuypers, M. M. M., Vagner, T., Paerl, R. W., Musat, N., and Zehr, J. P.: Nitrogen fixation and transfer in open ocean diatom–cyanobacterial symbioses, *The ISME Journal*, 5, 1484-1493, doi:<https://doi.org/10.1038/ismej.2011.26>, 2011.
- Gradoville, M., Cabello, A., Wilson, S., Turk-Kubo, K., Karl, D., and Zehr, J.: Light and depth dependency of nitrogen fixation by the non-photosynthetic, symbiotic cyanobacterium UCYN-A, *Environmental microbiology*, 23, doi:<https://doi.org/10.1111/1462-2920.15645>, 2021.
- Gradoville, M. R., Farnelid, H., White, A. E., Turk-Kubo, K. A., Stewart, B., Ribalet, F., Ferron, S., Pinedo-Gonzalez, P., Armbrust, E. V., Karl, D. M., John, S., and Zehr, J. P.: Latitudinal constraints on the abundance and activity of the cyanobacterium UCYN-A and other marine diazotrophs in the North Pacific, *Limnol Oceanogr*, doi:<https://doi.org/10.1002/lno.11423>, 2020.
- Gradoville, M. R., Dugenne, M., Hynes, A. M., Zehr, J. P., and White, A. E.: Empirical relationship between *nifH* gene abundance and diazotroph cell concentration in the North Pacific Subtropical Gyre, *Journal of Phycology*, doi:<https://doi.org/10.1111/jpy.13289>, 2022.
- Harrison, P., Zingone, A., Mickelson, M., Lehtinen, S., Nagappa, R., Kraberg, A., Sun, J., McQuatters-Gollop, A., and Jakobsen, H.: Cell volumes of marine phytoplankton from globally distributed coastal data sets, *Estuarine Coastal Shelf Sci.*, 162, doi:<https://doi.org/10.1016/j.ecss.2015.05.026>, 2015.
- Karlusich, J. J. P., Pelletier, E., Lombard, F., Carsique, M., Dvorak, E., Colin, S., Picheral, M., Cornejo-Castillo, F. M., Acinas, S. G., Pepperkok, R., Karsenti, E., De Vargas, C., Wincker, P., Bowler, C., and Foster, R. A.: Global distribution patterns of marine nitrogen-fixers by imaging and molecular methods, *Nat. Commun.*, 12, doi:<https://doi.org/10.1038/s41467-021-24299-y>, 2021.
- Krupke, A., Musat, N., LaRoche, J., Mohr, W., Fuchs, B. M., Amann, R. I., Kuypers, M. M. M., and Foster, R. A.: In situ identification and N<sub>2</sub> and C fixation rates of uncultivated cyanobacteria populations, *Syst. Appl. Microbiol.*, 36, 259-271, doi:<https://doi.org/10.1016/j.syapm.2013.02.002>, 2013.
- Lu, Y., Wen, Z., Shi, D., Chen, M., Zhang, Y., Bonnet, S., Li, Y., Tian, J., and Kao, S. J.: Effect of light on N<sub>2</sub> fixation and net nitrogen release of *Trichodesmium* in a field study, *Biogeosciences*, 15, 1-12, doi:<https://doi.org/10.5194/bg-15-1-2018>, 2018.
- Menden-Deuer, S., and Lessard, E. J.: Carbon to volume relationships for dinoflagellates, diatoms, and other protist plankton, *Limnol Oceanogr*, 45, 569-579, doi:<https://doi.org/10.4319/lo.2000.45.3.0569>, 2000.
- Sargent, E. C., Hitchcock, A., Johansson, S. A., Langlois, R., Moore, C. M., LaRoche, J., Poulton, A. J., and Bibby, T. S.: Evidence for polyploidy in the globally important diazotroph *Trichodesmium*, *FEMS Microbiol. Lett.*, 363, fnw244, doi:<https://doi.org/10.1093/femsle/fnw244>, 2016.

White, A. E., Watkins-Brandt, K. S., and Church, M. J.: Temporal variability of *Trichodesmium* spp. and diatom-diazotroph assemblages in the North Pacific subtropical gyre, *Front. Mar. Sci.*, 5, 27, doi:<https://doi.org/10.3389/fmars.2018.00027>, 2018.

Wilson, S. T., Aylward, F. O., Ribalet, F., Barone, B., Casey, J. R., Connell, P. E., Eppley, J. M., Ferrón, S., Fitzsimmons, J. N., Hayes, C. T., Romano, A. E., Turk-Kubo, K. A., Vislova, A., Armbrust, E. V., Caron, D. A., Church, M. J., Zehr, J. P., Karl, D. M., and DeLong, E. F.: Coordinated regulation of growth, activity and transcription in natural populations of the unicellular nitrogen-fixing cyanobacterium *Crocospaera*, *Nat. Microbiol.*, 2, 17118, doi:<https://doi.org/10.1038/nmicrobiol.2017.118>, 2017.
